# Supplementary material for: Remarkable Plasticity of Bone Iron Homeostasis in Hibernating Daurian Ground Squirrels (Spermophilus dauricus) May Be Involved in Bone Maintenance
Source: MDPI journal article supplement (doi:10.3390/ijms232415858), 2022-12-13
Supplement: s1 [file s1]

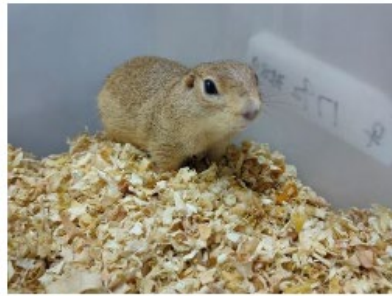

(A) Summer active group

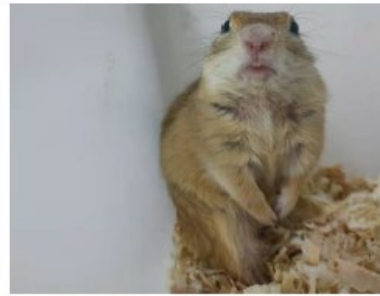

(B) Pre-hibernation group

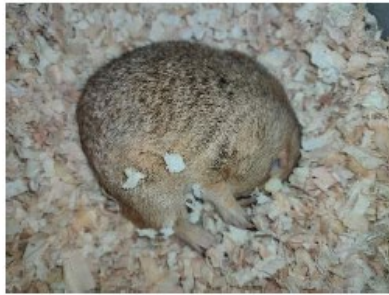

(C) Torpor group

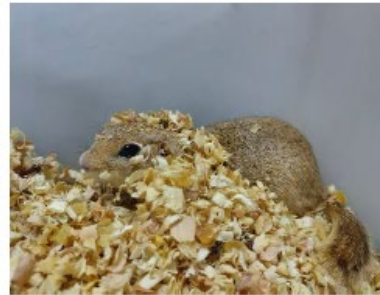

(D) Interbout arousal group

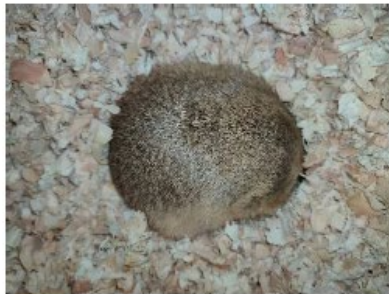

(E) Near the post-hibernation group

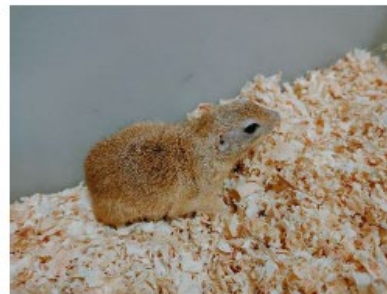

(F) Post-hibernation group

**Figure S1.** State of Daurian ground squirrels at different stages of hibernation. (A) Summer active group, (B) pre-hibernation group, (C) torpor group, (D) interbout arousal group, (E) near the post-hibernation group, (F) post-hibernation group. The entire hibernation period consists of multiple Torpor (at least 5 d with a stable body temperature of 5–8 °C) and Interbout arousal (34–37 °C for less than 12 h) cycles.

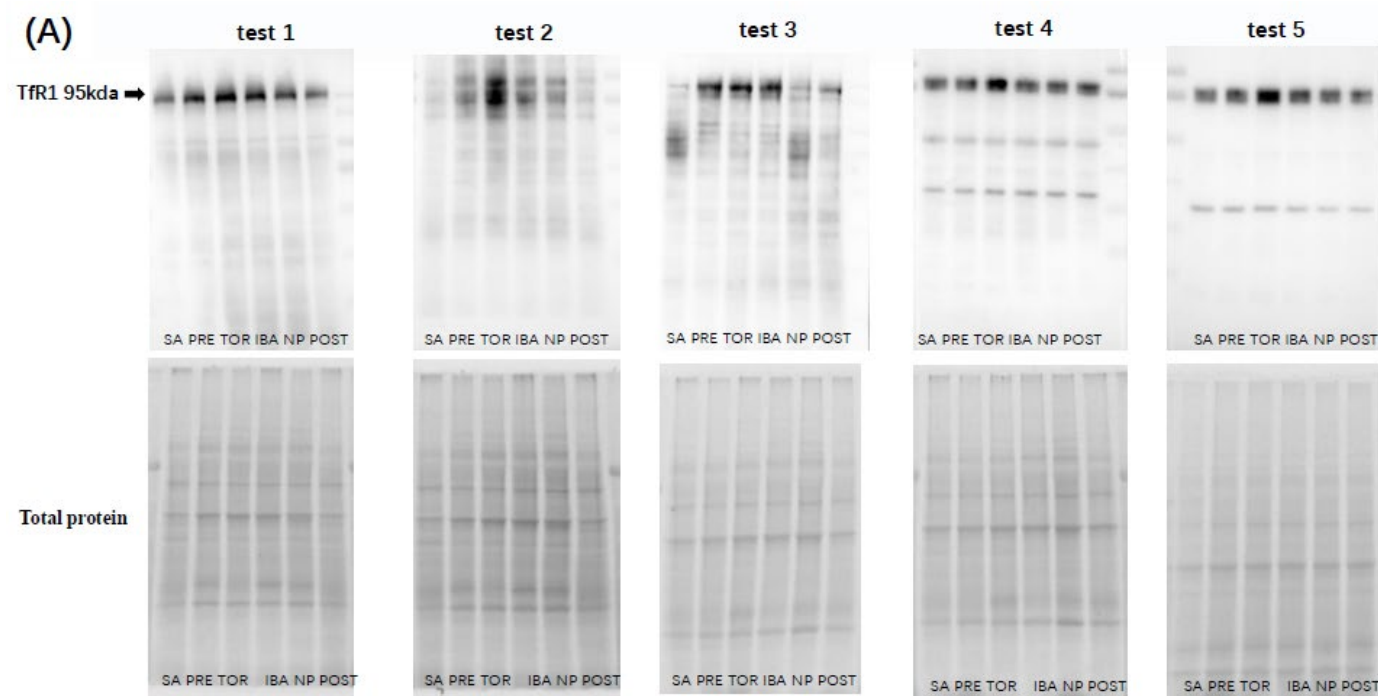

(B)

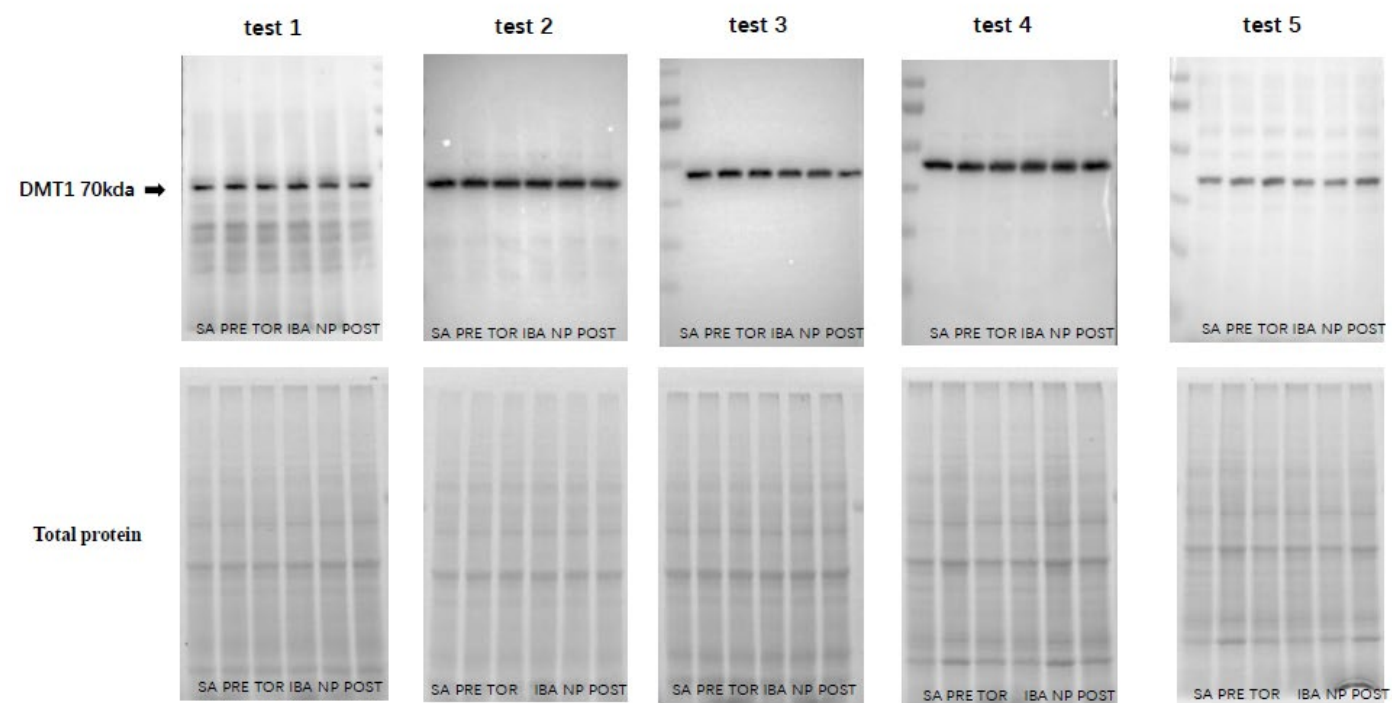

(C)

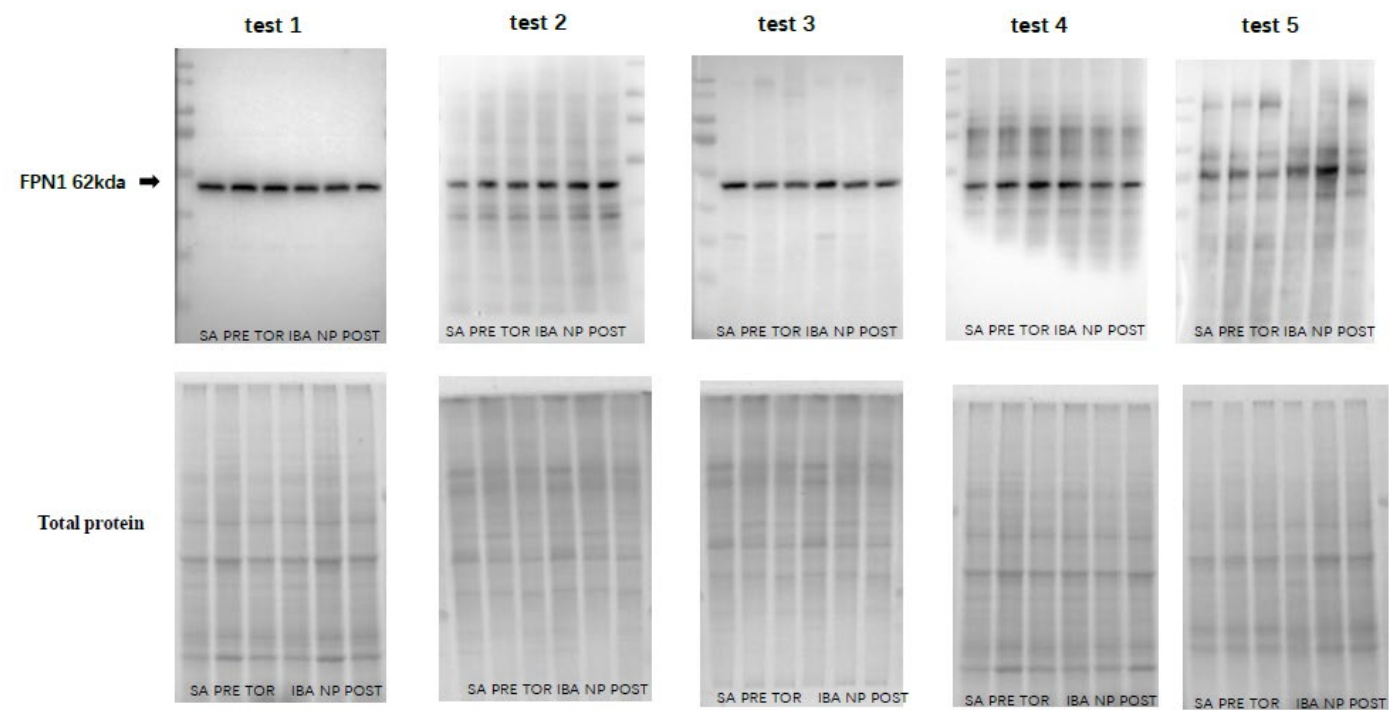

(D)

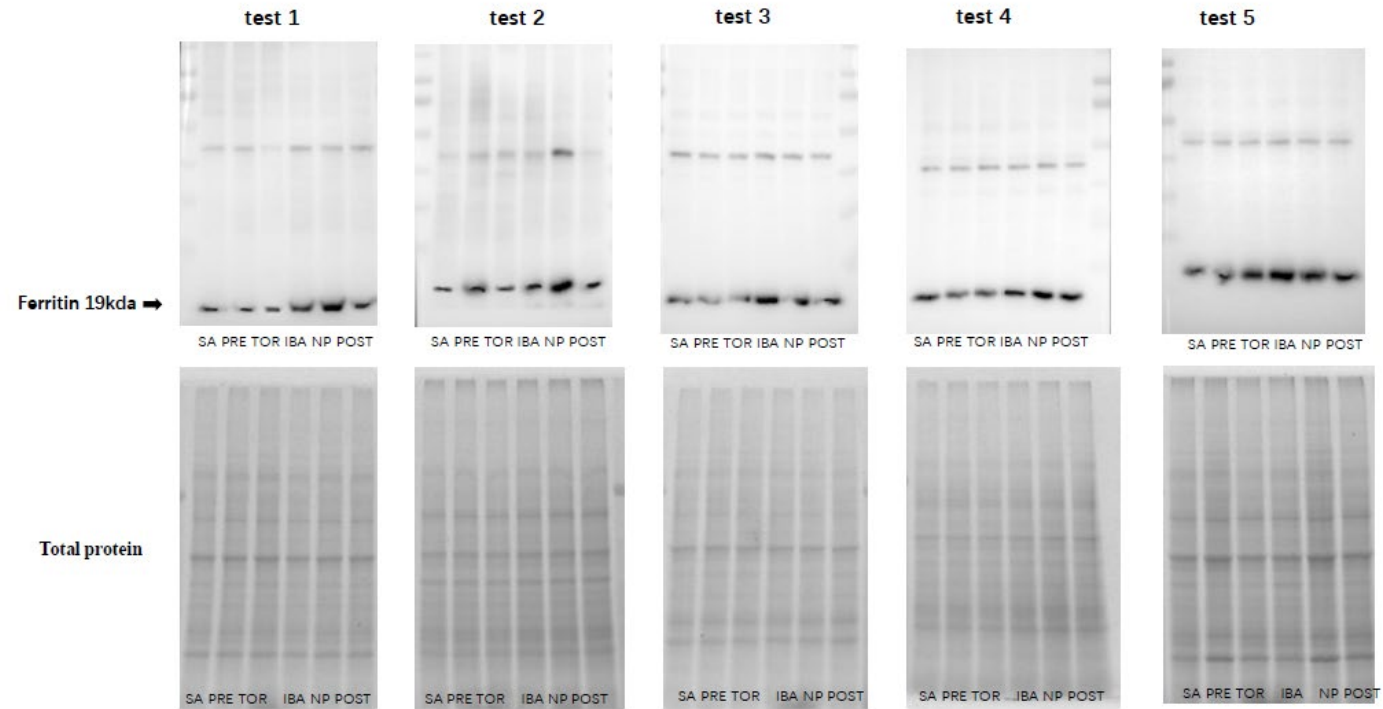

**Figure S2.** Western blotting of iron metabolism-related proteins in femur of Daurian ground squirrels during hibernation (n = 5). (A) TfR1, (B) DMT1, (C) FPN1, (D) Ferritin. Notes: TfR1, Transferrin receptor 1; DMT1, divalent metal transporter 1; FPN1, Ferroportin 1. SA, summer active group; PRE, pre-hibernation group; TOR, torpor group; IBA, interbout arousal group; NP, near post-hibernation group; and POST, post-hibernation group.

**Table S1.** The results of Micro CT in femur of Daurian ground squirrels in different periods. Cortical parameters included cortical area (Ct.Ar, mm<sup>2</sup>), cortical area fraction (Ct.Ar/Tt.Ar, %), and average cortical thickness (Ct.Th, mm). Trabecular parameters included tissue mineral density (TMD, mg/cm<sup>3</sup>), bone volume fraction (BV/TV, %), trabecular number (Tb.N, 1/mm), trabecular separation (Tb.Sp, mm), and trabecular thickness (Tb.Th, mm). Notes: SA, summer active group; PRE, pre-hibernation group; TOR, torpor group; IBA, interbout arousal group; NP, near post-hibernation group; and POST, post-hibernation group.

|                              | SA      | PRE     | TOR     | IBA     | NP      | POST    |
|------------------------------|---------|---------|---------|---------|---------|---------|
| TMD<br>(mg/cm <sup>3</sup> ) | 3134.68 | 3012.05 | 2919.26 | 2795.88 | 3076.95 | 2792.45 |
|                              | 2791.29 | 2515.98 | 2814.17 | 2992.49 | 2558.99 | 2968.81 |
|                              | 3002.23 | 2900.8  | 3201.23 | 2801.34 | 2724.78 | 3100.11 |
|                              | 2711.36 | 3101.99 | 2610.31 | 2908.41 | 2790.82 | 2543.21 |
|                              | 2509.4  | 2693.44 | 2708.66 | 3001.55 | 2529.78 | 3015.93 |
|                              | 2694.1  | 3005.24 | 2899.51 | 2460.33 | 2807.59 | 2400.88 |
|                              |         |         |         |         |         |         |
|                              | SA      | PRE     | TOR     | IBA     | NP      | POST    |
| BV/TV (%)                    | 32.95   | 24.2    | 24.54   | 32.13   | 29.97   | 33.37   |
|                              | 27.4    | 32.11   | 28.44   | 33.18   | 25.43   | 32.46   |
|                              | 31.4    | 28.4    | 29.22   | 30.4    | 26.83   | 30.1    |
|                              | 25.6    | 27.3    | 31.55   | 25.2    | 23.98   | 25.7    |
|                              | 26.4    | 35.24   | 25.6    | 25.1    | 23.16   | 26.7    |
|                              | 26.2    | 27.6    | 28.5    | 24.6    | 31.27   | 29.9    |
|                              |         |         |         |         |         |         |
|                              | SA      | PRE     | TOR     | IBA     | NP      | POST    |
| Tb.Th (mm)                   | 0.0795  | 0.0789  | 0.0642  | 0.0718  | 0.0775  | 0.0775  |
|                              | 0.0729  | 0.0668  | 0.0707  | 0.0609  | 0.082   | 0.082   |
|                              | 0.0829  | 0.0728  | 0.0722  | 0.0577  | 0.072   | 0.072   |
|                              | 0.071   | 0.0618  | 0.0787  | 0.0609  | 0.0662  | 0.0662  |
|                              | 0.0649  | 0.0632  | 0.0607  | 0.0667  | 0.0702  | 0.0702  |
|                              | 0.0769  | 0.0774  | 0.0647  | 0.0784  | 0.0632  | 0.0632  |
|                              |         |         |         |         |         |         |
|                              | SA      | PRE     | TOR     | IBA     | NP      | POST    |
| Tb.Sp (mm)                   | 0.1449  | 0.1914  | 0.1728  | 0.1908  | 0.1562  | 0.2251  |
|                              | 0.1319  | 0.1814  | 0.1815  | 0.1719  | 0.1755  | 0.1923  |
|                              | 0.1377  | 0.1828  | 0.1722  | 0.1821  | 0.1863  | 0.2013  |
|                              | 0.1619  | 0.1788  | 0.1671  | 0.1687  | 0.1901  | 0.1613  |
|                              | 0.1818  | 0.1523  | 0.1815  | 0.1887  | 0.1431  | 0.1713  |
|                              | 0.1421  | 0.1691  | 0.1515  | 0.1776  | 0.1976  | 0.1813  |
|                              |         |         |         |         |         |         |
|                              | SA      | PRE     | TOR     | IBA     | NP      | POST    |
| Tb.N<br>(1/mm)               | 1.6669  | 1.9191  | 1.5242  | 1.7563  | 1.9309  | 2.1790  |
|                              | 1.4591  | 2.0502  | 1.9174  | 2.0374  | 1.0723  | 1.5933  |
|                              | 1.5541  | 2.1102  | 1.8174  | 1.8984  | 1.7605  | 1.7933  |
|                              | 1.6591  | 1.9702  | 1.8554  | 2.0374  | 1.6971  | 1.8633  |

|                 |           |            |            |            |           |             |
|-----------------|-----------|------------|------------|------------|-----------|-------------|
|                 | 1. 4123   | 2. 0002    | 1. 7774    | 1. 8274    | 1. 9975   | 1. 7733     |
|                 | 1. 4545   | 1. 8302    | 1. 93      | 1. 5974    | 1. 6955   | 1. 6833     |
|                 | <b>SA</b> | <b>PRE</b> | <b>TOR</b> | <b>IBA</b> | <b>NP</b> | <b>POST</b> |
| Ct.Th (mm)      | 0. 1881   | 0. 1888    | 0. 1951    | 0. 1904    | 0. 1986   | 0. 2037     |
|                 | 0. 1792   | 0. 1931    | 0. 1925    | 0. 1917    | 0. 1906   | 0. 1906     |
|                 | 0. 1912   | 0. 1882    | 0. 1945    | 0. 1806    | 0. 1955   | 0. 1955     |
|                 | 0. 1732   | 0. 1761    | 0. 1925    | 0. 1748    | 0. 1936   | 0. 1936     |
|                 | 0. 1752   | 0. 1821    | 0. 1785    | 0. 1878    | 0. 2037   | 0. 1986     |
|                 | 0. 1988   | 0. 1771    | 0. 1811    | 0. 1952    | 0. 1816   | 0. 1916     |
|                 | <b>SA</b> | <b>PRE</b> | <b>TOR</b> | <b>IBA</b> | <b>NP</b> | <b>POST</b> |
| Ct.Ar/Tt.Ar (%) | 16. 7608  | 19. 7623   | 20. 8258   | 19. 6814   | 22. 6895  | 20. 039     |
|                 | 16. 6355  | 18. 2434   | 16. 6194   | 19. 1462   | 22. 5271  | 18. 6759    |
|                 | 15. 5102  | 17. 7245   | 18. 6124   | 18. 611    | 21. 9423  | 17. 3128    |
|                 | 17. 3849  | 16. 5056   | 19. 6193   | 18. 0758   | 16. 885   | 18. 9497    |
|                 | 15. 2596  | 18. 6867   | 16. 2144   | 17. 2806   | 19. 0101  | 17. 5866    |
|                 | 13. 4343  | 19. 1678   | 18. 2564   | 17. 9154   | 21. 5154  | 18. 1235    |
|                 | <b>SA</b> | <b>PRE</b> | <b>TOR</b> | <b>IBA</b> | <b>NP</b> | <b>POST</b> |
| Ct.Ar<br>(mm2)  | 2. 3233   | 1. 9854    | 2. 3129    | 2. 3996    | 2. 3322   | 2. 3322     |
|                 | 2. 2717   | 1. 9458    | 2. 2703    | 2. 2091    | 2. 2085   | 2. 2085     |
|                 | 2. 3201   | 1. 9058    | 2. 4277    | 2. 2316    | 2. 3085   | 2. 3085     |
|                 | 2. 0985   | 2. 0658    | 2. 2351    | 2. 188     | 2. 1185   | 2. 1185     |
|                 | 2. 1369   | 2. 1958    | 2. 0125    | 2. 1029    | 2. 1785   | 2. 1785     |
|                 | 2. 4153   | 2. 1058    | 2. 1199    | 2. 4026    | 2. 2385   | 2. 2385     |

**Table S2.** *P* values of the differences between groups based on the multiple comparison tests (Tamhane or Sidak test). *P* values with statistical differences are marked in red. Notes: Ct.Ar (cortical area), Ct.Ar/Tt.Ar (cortical area fraction), Ct.Th (cortical thickness), TMD (tissue mineral density), BV/TV (bone volume fraction), Tb.N (trabecular number), Tb.Sp (trabecular separation), and Tb.Th (trabecular thickness). HJV, hemojuvelin; BMP6, bone morphogenetic protein 6; Tfr1, Transferrin receptor 1; DMT1, divalent metal transporter 1; FPN1, Ferroportin 1. SA, summer active group; PRE, pre- hibernation group; TOR, torpor group; IBA, interbout arousal group; NP, near post-hibernation group; and POST, post-hibernation group.

| Variables                                  | Tissues | Groups |        |       |        |        |         |       |        |        |         |        |        |         |       |        |
|--------------------------------------------|---------|--------|--------|-------|--------|--------|---------|-------|--------|--------|---------|--------|--------|---------|-------|--------|
|                                            |         | SA vs. |        |       |        |        | PRE vs. |       |        |        | TOR vs. |        |        | IBA vs. |       | NP vs. |
|                                            |         | PRE    | TOR    | IBA   | NP     | POST   | TOR     | IBA   | NP     | POST   | IBA     | NP     | POST   | NP      | POST  | POST   |
| Femur mass (g)                             | Femur   | 0.833  | 0.238  | 0.307 | 0.075  | 0.114  | 1.000   | 1.000 | 0.961  | 0.988  | 1.000   | 1.000  | 1.000  | 0.997   | 1.000 | 1.000  |
| Ultimate stress (MPa)                      | Femur   | 1.000  | 1.000  | 0.867 | 1.000  | 0.993  | 1.000   | 0.965 | 1.000  | 0.953  | 0.985   | 0.999  | 0.911  | 0.530   | 0.168 | 1.000  |
| Stiffness (N/mm)                           | Femur   | 0.888  | 1.000  | 1.000 | 1.000  | 0.993  | 0.410   | 0.994 | 0.821  | 0.183  | 0.989   | 1.000  | 1.000  | 1.000   | 0.876 | 0.998  |
| TMD (mg/cm <sup>3</sup> )                  | Femur   | 1.000  | 1.000  | 1.000 | 1.000  | 1.000  | 1.000   | 1.000 | 0.998  | 1.000  | 1.000   | 1.000  | 1.000  | 1.000   | 1.000 | 1.000  |
| BV/TV (%)                                  | Femur   | 1.000  | 1.000  | 1.000 | 1.000  | 1.000  | 1.000   | 1.000 | 0.979  | 1.000  | 1.000   | 1.000  | 0.999  | 0.999   | 1.000 | 0.891  |
| Tb.Th (mm)                                 | Femur   | 0.992  | 0.897  | 0.478 | 1.000  | 1.000  | 1.000   | 0.997 | 1.000  | 1.000  | 1.000   | 1.000  | 1.000  | 0.933   | 0.933 | 1.000  |
| Tb.Sp (mm)                                 | Femur   | 0.169  | 0.445  | 0.065 | 0.218  | 0.006  | 1.000   | 1.000 | 1.000  | 0.963  | 0.999   | 1.000  | 0.710  | 1.000   | 0.999 | 0.928  |
| Tb.N (1/mm)                                | Femur   | 0.005  | 0.277  | 0.093 | 0.933  | 0.229  | 0.859   | 0.993 | 0.197  | 0.905  | 1.000   | 0.997  | 1.000  | 0.902   | 1.000 | 0.993  |
| Ct.Th (mm)                                 | Femur   | 1.000  | 0.993  | 1.000 | 0.405  | 0.193  | 0.992   | 1.000 | 0.397  | 0.188  | 1.000   | 0.991  | 0.898  | 0.822   | 0.541 | 1.000  |
| Ct.Ar/Tt.Ar (%)                            | Femur   | 0.098  | 0.096  | 0.074 | <0.001 | 0.075  | 1.000   | 1.000 | 0.130  | 1.000  | 1.000   | 0.134  | 1.000  | 0.170   | 1.000 | 0.168  |
| Ct.Ar (mm <sup>2</sup> )                   | Femur   | 0.021  | 1.000  | 1.000 | 1.000  | 1.000  | 0.073   | 0.027 | 0.070  | 0.070  | 1.000   | 1.000  | 1.000  | 1.000   | 1.000 | 1.000  |
| Liver iron (μg/g)                          | Liver   | 0.001  | 0.017  | 1.000 | 1.000  | 1.000  | 0.988   | 0.001 | <0.001 | <0.001 | 0.014   | 0.008  | 0.012  | 1.000   | 1.000 | 1.000  |
| Bone iron (μg/g)                           | Femur   | 0.449  | <0.001 | 0.219 | 0.059  | 1.000  | 0.026   | 1.000 | 0.998  | 0.950  | 0.070   | 0.251  | 0.001  | 1.000   | 0.754 | 0.338  |
| Prussian blue staining (IOD value)         | Liver   | 0.149  | 0.010  | 0.947 | 0.813  | 1.000  | 0.856   | 0.451 | 0.800  | 0.157  | <0.001  | 0.038  | <0.001 | 1.000   | 0.836 | 0.757  |
| Prussian blue staining of (IOD value)      | Femur   | <0.001 | <0.001 | 0.001 | <0.001 | <0.001 | 0.676   | 0.089 | 0.515  | 0.931  | 0.001   | 0.008  | 0.042  | 0.999   | 0.878 | 1.000  |
| Liver Hpcidin (ng/g)                       | Liver   | 1.000  | <0.001 | 0.883 | 0.015  | 0.038  | <0.001  | 0.997 | 0.058  | 0.140  | <0.001  | 0.118  | 0.048  | 0.483   | 0.763 | 1.000  |
| Liver HJV (ng/g)                           | Liver   | 0.119  | 0.018  | 1.000 | 0.038  | 0.945  | 0.709   | 0.011 | 0.917  | 0.460  | 0.018   | 1.000  | 0.076  | 0.036   | 0.538 | 0.164  |
| Liver BMP6 (ng/g)                          | Liver   | <0.001 | <0.001 | 0.001 | <0.001 | <0.001 | <0.001  | 0.540 | 0.889  | 0.816  | <0.001  | 0.029  | 0.040  | 0.018   | 0.013 | 1.000  |
| Relative protein level of DMT1 in bone     | Femur   | 1.000  | 1.000  | 1.000 | 1.000  | 1.000  | 0.890   | 0.980 | 1.000  | 1.000  | 1.000   | 0.999  | 0.998  | 1.000   | 1.000 | 1.000  |
| Relative protein level of Tfr1 in bone     | Femur   | 0.824  | 0.001  | 1.000 | 1.000  | 1.000  | 0.056   | 0.955 | 0.349  | 0.898  | 0.002   | <0.001 | 0.001  | 0.998   | 1.000 | 1.000  |
| Relative protein level of FPN1 in bone     | Femur   | 1.000  | 1.000  | 0.991 | 1.000  | 1.000  | 1.000   | 0.838 | 0.999  | 0.999  | 0.971   | 1.000  | 1.000  | 1.000   | 1.000 | 1.000  |
| Relative protein level of Ferritin in bone | Femur   | 0.953  | 0.072  | 0.141 | 0.035  | 0.009  | 0.928   | 0.046 | 0.016  | 0.003  | 0.034   | 0.019  | 0.005  | 0.387   | 0.711 | 0.995  |
